# Supplementary material for: Burden of hydrocephalus disease in Colombia (2015-2024): An AVAD/DALYS analysis from official sources
Source: Research Square preprint supplement (doi:10.21203/rs.3.rs-7125623/v1), 2025-08-13
Supplement: Supplementary file 1 [file 04a96d1c1fe1f672e989f5c0.xlsx]

## Sheet: DALYs
DEPARTMENT	MALE																						DEPARTMENT	FEMALE
	2015		2016		2017		2018		2019		2020		2021		2022		2023		2024					2015		2016		2017		2018		2019		2020		2021		2022		2023		2024
	DALYs	DALYs por 1,000 hbts	DALYs	DALYs por 1,000 hbts	DALYs	DALYs por 1,000 hbts	DALYs	DALYs por 1,000 hbts	DALYs	DALYs por 1,000 hbts	DALYs	DALYs por 1,000 hbts	DALYs	DALYs por 1,000 hbts	DALYs	DALYs por 1,000 hbts	DALYs	DALYs por 1,000 hbts	DALYs	DALYs por 1,000 hbts				DALYs	DALYs por 1,000 hbts	DALYs	DALYs por 1,000 hbts	DALYs	DALYs por 1,000 hbts	DALYs	DALYs por 1,000 hbts	DALYs	DALYs por 1,000 hbts	DALYs	DALYs por 1,000 hbts	DALYs	DALYs por 1,000 hbts	DALYs	DALYs por 1,000 hbts	DALYs	DALYs por 1,000 hbts	DALYs	DALYs por 1,000 hbts
Amazonas	0	0	0	0	0	0	16.8584	0.416833	16.8584	0.416833	16.8584	0.416833	16.8584	0.416833	0	0	0	0	0	0			Amazonas	34.4315	0.922873	17.2157	0.461437	0	0	0	0	47.0973	1.26236	0	0	17.2157	0.461437	46.5202	1.24689	17.2157	0.461437	0	0
Antioquia	1117.97	0.35323	976.143	0.308418	1022.29	0.322999	1380.02	0.436024	1853.75	0.585704	1221.85	0.386049	1468.31	0.463919	1196.92	0.378173	1490.39	0.470896	984.72	0.311128			Antioquia	994.007	0.293633	756.924	0.223598	793.503	0.234403	1349.62	0.398682	1409.17	0.416272	1358.26	0.401233	1788.22	0.528246	1714.37	0.50643	957.64	0.28289	824.389	0.243527
Arauca	16.8584	0.119576	30.3036	0.214942	16.8584	0.119576	84.2921	0.59788	50.5752	0.358728	33.7168	0.239152	84.2921	0.59788	54.7406	0.388272	194.1	1.37674	0	0			Arauca	30.3351	0.218043	0	0	47.0973	0.338528	115.96	0.833503	51.6472	0.371232	82.1696	0.590621	64.313	0.462271	34.4315	0.247488	51.6472	0.371232	61.502	0.442066
Atlántico	690.095	0.537149	471.209	0.366775	436.038	0.339399	642.597	0.500178	868.854	0.676289	803.207	0.625192	625.593	0.486943	904.358	0.703925	587.521	0.457308	322.181	0.250776			Atlántico	441.603	0.326288	338.71	0.250264	503.972	0.372371	289.791	0.214119	635.29	0.469398	664.703	0.49113	547.717	0.404693	481.793	0.355983	525.306	0.388134	283.852	0.209731
Bogotá	1410.64	0.388244	1428.95	0.393283	1248.09	0.343506	1597.56	0.439689	2105.23	0.579412	1190.58	0.327678	1292.37	0.355692	1082.31	0.297878	1098.75	0.302405	840.775	0.231402			Bogotá	1452.02	0.366719	1345.34	0.339776	1080.22	0.272817	1561.32	0.394325	1230.71	0.310826	947.235	0.239232	1390.59	0.351205	1055.46	0.266565	865.537	0.218598	807.641	0.203976
Bolívar	549.805	0.520232	287.543	0.272077	359.46	0.340125	418.402	0.395896	369.178	0.34932	503.198	0.476132	771.633	0.730127	526.974	0.498629	715.58	0.67709	397.791	0.376394			Bolívar	502.916	0.468411	206.954	0.192755	457.852	0.426438	241.968	0.225367	374.837	0.349119	630.409	0.587156	487.976	0.454495	557.877	0.5196	690.753	0.64336	305.333	0.284384
Boyacá	512.146	0.844965	255.188	0.421023	228.988	0.377796	134.867	0.222511	225.015	0.371242	209.623	0.345847	208.102	0.343338	305.74	0.504426	209.623	0.345847	124.09	0.204731			Boyacá	181.196	0.290008	29.8816	0.0478262	207.809	0.332603	191.646	0.306734	244.724	0.391687	175.502	0.280896	259.781	0.415786	140.242	0.224461	346.691	0.554888	72.0693	0.115349
Caldas	314.602	0.644369	100.052	0.204927	113.906	0.233303	343.228	0.703	358.412	0.734101	259.383	0.531268	176.452	0.36141	289.428	0.592807	177.926	0.364429	0	0			Caldas	302.244	0.581114	143.304	0.275527	196.346	0.377507	211.718	0.407063	266.581	0.512547	166.464	0.320055	271.721	0.52243	168.248	0.323485	154.102	0.296288	81.3304	0.156371
Caquetá	131.454	0.639657	50.5752	0.2461	198.888	0.96779	64.0204	0.311524	236.018	1.14847	202.301	0.984399	326.035	1.58649	148.312	0.72169	295.935	1.44003	168.584	0.820333			Caquetá	184.246	0.918315	133.176	0.663773	34.4315	0.171613	34.4315	0.171613	221.375	1.10337	186.521	0.929655	120.51	0.600644	51.6472	0.257419	133.817	0.666966	80.2601	0.40003
Casanare	97.7372	0.452041	84.2921	0.389857	84.8714	0.392536	16.8584	0.0779713	101.15	0.467828	67.4336	0.311885	36.0264	0.166625	0	0	0	0	0	0			Casanare	17.2157	0.0810725	91.0204	0.428634	68.863	0.32429	99.3853	0.468026	116.414	0.548216	17.2157	0.0810725	95.9351	0.451778	17.2157	0.0810725	52.5952	0.247682	0	0
Cauca	310.07	0.423773	279.496	0.381988	252.111	0.34456	166.869	0.22806	448.928	0.61355	271.809	0.371482	293.793	0.401527	424.462	0.580113	230.245	0.314676	174.962	0.239121			Cauca	370.93	0.496747	171.8	0.230074	233.661	0.312917	151.033	0.202262	237.111	0.317538	200.788	0.268894	308.835	0.413589	267.712	0.358519	239.072	0.320163	293.319	0.392811
Cesar	354.238	0.572015	222.161	0.35874	295.524	0.477205	224.316	0.36222	218.061	0.35212	270.192	0.436299	212.333	0.34287	309.032	0.499018	219.38	0.354249	97.7372	0.157824			Cesar	318.06	0.502372	201.272	0.317906	159.817	0.252429	211.718	0.334406	319.359	0.504423	271.543	0.428898	199.23	0.31468	173.402	0.273886	352.034	0.556033	209.231	0.330478
Chocó	67.4336	0.252954	47.162	0.176912	46.9584	0.176148	33.7168	0.126477	198.266	0.743724	42.6341	0.159927	16.8584	0.0632384	77.262	0.289821	0	0	63.3309	0.237563			Chocó	125.999	0.460945	103.294	0.377886	34.4315	0.125962	64.9538	0.237623	73.992	0.270688	86.0787	0.314905	133.629	0.488862	146.936	0.537542	99.3853	0.363585	14.0253	0.0513094
Córdoba	559.533	0.621794	334.666	0.371905	346.099	0.384611	334.689	0.37193	591.188	0.656971	395.591	0.43961	319.742	0.355321	519.99	0.577851	606.579	0.674075	302.456	0.336112			Córdoba	416.842	0.458789	249.2	0.274277	238.331	0.262315	278.276	0.306279	344.676	0.379361	402.229	0.442706	338.597	0.37267	234.463	0.258058	220.772	0.242988	124.167	0.136662
Cundinamarca	651.683	0.427402	616.015	0.404009	360.119	0.236182	666.185	0.436913	744.029	0.487966	664.404	0.435745	848.457	0.556455	757.291	0.496664	408.223	0.26773	279.73	0.183459			Cundinamarca	309.366	0.198214	478.483	0.306569	276.127	0.176918	354.595	0.227193	537.387	0.344309	536.752	0.343903	533.862	0.342051	412.926	0.264566	358.467	0.229673	269.125	0.172431
Guainía	0	0	0	0	30.1	1.16798	0	0	16.8584	0.654162	30.1	1.16798	16.8584	0.654162	16.8584	0.654162	28.9293	1.12255	0	0			Guainía	17.2157	0.726341	0	0	0	0	0	0	34.4315	1.45268	17.2157	0.726341	17.2157	0.726341	0	0	0	0	0	0
La Guajira	80.8788	0.178175	158.141	0.348383	67.4336	0.148556	255.524	0.562917	326.928	0.720221	178.412	0.393041	187.885	0.41391	310.512	0.684055	271.843	0.598869	84.5125	0.18618			La Guajira	149.248	0.31515	271.025	0.572292	133.176	0.281212	259.815	0.548622	352.494	0.744322	243.751	0.514702	210.183	0.44382	202.68	0.427975	330.509	0.697898	122.402	0.258462
Guaviare	0	0	0	0	0	0	0	0	64.0204	1.42119	50.5752	1.12272	50.5752	1.12272	33.7168	0.748481	0	0	0	0			Guaviare	0	0	0	0	0	0	17.2157	0.433985	17.2157	0.433985	0	0	0	0	0	0	0	0	0	0
Huila	343.38	0.619206	97.7372	0.176247	118.009	0.212802	255.186	0.460169	355.567	0.641183	232.401	0.419082	365.371	0.658863	455.177	0.820807	126.463	0.228047	155.972	0.281259			Huila	164.152	0.294551	149.598	0.268435	198.411	0.356025	219.895	0.394576	274.606	0.492747	172.157	0.308916	223.805	0.40159	206.589	0.370699	278.42	0.49959	110.654	0.198556
Magdalena	353.554	0.508822	239.698	0.344965	359.918	0.517982	249.11	0.35851	360.854	0.519329	287.291	0.413459	261.789	0.376757	246.372	0.354571	423.728	0.609815	158.542	0.228169			Magdalena	198.388	0.285868	237.058	0.34159	237.938	0.342857	332.433	0.47902	485.641	0.699786	309.588	0.446102	425.858	0.613641	268.519	0.386923	311.281	0.448541	63.2469	0.0911359
Meta	194.013	0.365235	60.4036	0.113712	161.068	0.303216	178.543	0.336113	510.324	0.960702	340.609	0.641207	519.092	0.977208	329.718	0.620705	62.1776	0.117051	60.2529	0.113428			Meta	79.1457	0.151933	122.167	0.23452	171.318	0.328872	268.266	0.51498	310.012	0.595117	199.82	0.383586	339.379	0.651492	267.134	0.512807	259.758	0.498646	87.0533	0.167113
Nariño	403.263	0.506106	292.483	0.367073	231.23	0.2902	294.932	0.370147	580.692	0.728783	215.542	0.270512	338.124	0.424354	178.543	0.224076	114.392	0.143565	148.312	0.186136			Nariño	312.759	0.375829	202.68	0.243551	356.995	0.428985	265.198	0.318676	376.952	0.452966	228.094	0.274091	428.854	0.515335	399.438	0.479987	163.121	0.196016	76.3509	0.0917475
Norte de Santander	358.341	0.464332	128.041	0.165913	158.141	0.204916	367.472	0.476163	427.186	0.553539	387.859	0.502581	549.734	0.712335	464.712	0.602166	391.03	0.50669	158.718	0.205664			Norte de Santander	335.882	0.423224	160.889	0.202726	167.607	0.211192	250.418	0.315536	327.678	0.412887	362.143	0.456314	396.903	0.500112	519.53	0.654627	212.494	0.26775	98.6463	0.124298
Putumayo	123.166	0.691154	16.8584	0.00561158	76.0037	0.426501	64.0204	0.359255	75.1937	0.421955	67.4336	0.378409	111.109	0.623499	16.8584	0.0946023	127.593	0.715996	16.8584	0.0946023			Putumayo	34.4315	0.196128	0	0	47.7381	0.271925	34.4315	0.196128	82.1696	0.468053	103.294	0.588385	17.2157	0.0980641	17.2157	0.0980641	47.7381	0.271925	64.313	0.366339
Quindío	78.0429	0.295787	76.6872	0.290649	80.6752	0.305764	161.403	0.611729	134.867	0.511155	97.2892	0.368732	112.797	0.427506	118.009	0.447261	204.082	0.773484	43.6758	0.165534			Quindío	120.51	0.424321	68.506	0.241212	129.548	0.456145	133.629	0.470515	223.805	0.788025	64.9538	0.228705	76.3666	0.26889	96.0076	0.338047	90.8142	0.31976	59.2504	0.208623
Risaralda	130.339	0.286408	103.397	0.227204	233.265	0.512577	84.2921	0.185223	262.908	0.577715	131.454	0.288857	129.353	0.284241	127.975	0.281213	236.566	0.519831	43.6108	0.0958305			Risaralda	193.456	0.388913	0	0	123.717	0.248712	181.555	0.364987	186.183	0.374291	150.845	0.30325	154.102	0.309799	146.058	0.293626	120.51	0.242267	65.6726	0.132024
San Andrés	0	0	29.614	0.981703	0	0	0	0	0	0	0	0	0	0	0	0	0	0	0	0			San Andrés	0	0	0	0	0	0	0	0	0	0	9.03816	0.279681	30.5223	0.944496	0	0	0	0	0	0
Santander	507.38	0.463246	181.34	0.165566	277.666	0.253514	336.143	0.306904	707.446	0.64591	629.144	0.574419	446.443	0.40761	319.109	0.291352	449.981	0.41084	340.157	0.310569			Santander	393.992	0.344906	309.604	0.271031	340.201	0.297817	271.355	0.237548	607.852	0.532122	314.769	0.275553	360.421	0.315518	369.71	0.323649	353.101	0.30911	261.885	0.229258
Sucre	171.236	0.36704	160.383	0.343777	165.171	0.354039	319.143	0.684073	299.416	0.64179	386.117	0.82763	203.142	0.435429	437.491	0.937749	521.948	1.11878	180.796	0.387532			Sucre	122.305	0.264471	117.089	0.253193	296.81	0.64182	397.952	0.860529	287.323	0.621306	197.013	0.426019	110.037	0.237943	342.072	0.739693	365.49	0.790333	272.763	0.589819
Tolima	320.029	0.48392	68.3672	0.103379	177.628	0.268594	262.561	0.397022	391.099	0.591387	440.522	0.66612	291.16	0.416833	276.028	0.417386	125.736	0.190128	135.695	0.205187			Tolima	168.248	0.249631	68.863	0.102173	233.015	0.345726	124.421	0.184605	345.972	0.513321	255.046	0.378413	258.778	0.383951	157.214	0.23326	227.011	0.336818	191.043	0.283452
Valle de Cauca	1022.25	0.477949	660.898	0.309001	1110.77	0.519335	822.819	0.384707	1484.97	0.694292	1024.38	0.478945	830.8	0.388438	695.319	0.325094	547.465	0.255966	309.273	0.1446			Valle de Cauca	1020.88	0.431124	625.644	0.264214	901.113	0.380546	770.52	0.325396	1130.66	0.477488	885.437	0.373926	914.981	0.386403	468.625	0.197903	714.623	0.30179	389.384	0.164439
Vaupes	0	0	30.3036	1.35314	0	0	0	0	0	0	0	0	0	0	0	0	0	0	0	0			Vaupes	0	0	0	0	47.7381	2.34862	0	0	0	0	17.2157	0.846981	34.4315	1.69396	17.2157	0.846981	47.5508	2.33941	0	0
Vichada	0	0	0	0	16.8584	0.288109	0	0	84.2921	1.44055	16.8584	0.288109	33.7168	0.576218	16.8584	0.288109	0	0	16.8584	0.288109			Vichada	64.7665	1.24348	0	0	0	0	17.2157	0.330532	0	0	30.5223	0.58601	0	0	0	0	17.2157	0.330532	0	0
	MALE															FEMALE
DEPARTMENT	DALYs 2015	DALYs 2016	DALYs 2017	DALYs 2018	DALYs 2019	DALYs 2020	DALYs 2021	DALYs 2022	DALYs 2023	DALYs 2024	Total 2015-2024				DEPARTMENT	DALYs 2015	DALYs 2016	DALYs 2017	DALYs 2018	DALYs 2019	DALYs 2020	DALYs 2021	DALYs 2022	DALYs 2023	DALYs 2024	Total 2015-2024
Amazonas	0	0	0	16.8584	16.8584	16.8584	16.8584	0	0	0	67.4336				Amazonas	34.4315	17.2157	0	0	47.0973	0	17.2157	46.5202	17.2157	0	179.696
Antioquia	1117.97	976.143	1022.29	1380.02	1853.75	1221.85	1468.31	1196.92	1490.39	984.72	12712.4				Antioquia	994.007	756.924	793.503	1349.62	1409.17	1358.26	1788.22	1714.37	957.64	824.389	11946.1
Arauca	16.8584	30.3036	16.8584	84.2921	50.5752	33.7168	84.2921	54.7406	194.1	0	565.737				Arauca	30.3351	0	47.0973	115.96	51.6472	82.1696	64.313	34.4315	51.6472	61.502	539.103
Atlántico	690.095	471.209	436.038	642.597	868.854	803.207	625.593	904.358	587.521	322.181	6351.65				Atlántico	441.603	338.71	503.972	289.791	635.29	664.703	547.717	481.793	525.306	283.852	4712.74
Bogotá	1410.64	1428.95	1248.09	1597.56	2105.23	1190.58	1292.37	1082.31	1098.75	840.775	13295.3				Bogotá	1452.02	1345.34	1080.22	1561.32	1230.71	947.235	1390.59	1055.46	865.537	807.641	11736.1
Bolívar	549.805	287.543	359.46	418.402	369.178	503.198	771.633	526.974	715.58	397.791	4899.57				Bolívar	502.916	206.954	457.852	241.968	374.837	630.409	487.976	557.877	690.753	305.333	4456.88
Boyacá	512.146	255.188	228.988	134.867	225.015	209.623	208.102	305.74	209.623	124.09	2413.38				Boyacá	181.196	29.8816	207.809	191.646	244.724	175.502	259.781	140.242	346.691	72.0693	1849.54
Caldas	314.602	100.052	113.906	343.228	358.412	259.383	176.452	289.428	177.926	0	2133.39				Caldas	302.244	143.304	196.346	211.718	266.581	166.464	271.721	168.248	154.102	81.3304	1962.06
Caquetá	131.454	50.5752	198.888	64.0204	236.018	202.301	326.035	148.312	295.935	168.584	1822.12				Caquetá	184.246	133.176	34.4315	34.4315	221.375	186.521	120.51	51.6472	133.817	80.2601	1180.42
Casanare	97.7372	84.2921	84.8714	16.8584	101.15	67.4336	36.0264	0	0	0	488.37				Casanare	17.2157	91.0204	68.863	99.3853	116.414	17.2157	95.9351	17.2157	52.5952	0	575.86
Cauca	310.07	279.496	252.111	166.869	448.928	271.809	293.793	424.462	230.245	174.962	2852.75				Cauca	370.93	171.8	233.661	151.033	237.111	200.788	308.835	267.712	239.072	293.319	2474.26
Cesar	354.238	222.161	295.524	224.316	218.061	270.192	212.333	309.032	219.38	97.7372	2422.97				Cesar	318.06	201.272	159.817	211.718	319.359	271.543	199.23	173.402	352.034	209.231	2415.66
Chocó	67.4336	47.162	46.9584	33.7168	198.266	42.6341	16.8584	77.262	0	63.3309	593.622				Chocó	125.999	103.294	34.4315	64.9538	73.992	86.0787	133.629	146.936	99.3853	14.0253	882.725
Córdoba	559.533	334.666	346.099	334.689	591.188	395.591	319.742	519.99	606.579	302.456	4310.53				Córdoba	416.842	249.2	238.331	278.276	344.676	402.229	338.597	234.463	220.772	124.167	2847.55
Cundinamarca	651.683	616.015	360.119	666.185	744.029	664.404	848.457	757.291	408.223	279.73	5996.14				Cundinamarca	309.366	478.483	276.127	354.595	537.387	536.752	533.862	412.926	358.467	269.125	4067.09
Guainía	0	0	30.1	0	16.8584	30.1	16.8584	16.8584	28.9293	0	139.705				Guainía	17.2157	0	0	0	34.4315	17.2157	17.2157	0	0	0	86.0787
Guaviare	0	0	0	0	64.0204	50.5752	50.5752	33.7168	0	0	198.888				Guaviare	0	0	0	17.2157	17.2157	0	0	0	0	0	34.4315
Huila	343.38	97.7372	118.009	255.186	355.567	232.401	365.371	455.177	126.463	155.972	2505.26				Huila	164.152	149.598	198.411	219.895	274.606	172.157	223.805	206.589	278.42	110.654	1998.29
La Guajira	80.8788	158.141	67.4336	255.524	326.928	178.412	187.885	310.512	271.843	84.5125	1922.07				La Guajira	149.248	271.025	133.176	259.815	352.494	243.751	210.183	202.68	330.509	122.402	2275.28
Magdalena	353.554	239.698	359.918	249.11	360.854	287.291	261.789	246.372	423.728	158.542	2940.85				Magdalena	198.388	237.058	237.938	332.433	485.641	309.588	425.858	268.519	311.281	63.2469	2869.95
Meta	194.013	60.4036	161.068	178.543	510.324	340.609	519.092	329.718	62.1776	60.2529	2416.2				Meta	79.1457	122.167	171.318	268.266	310.012	199.82	339.379	267.134	259.758	87.0533	2104.05
Nariño	403.263	292.483	231.23	294.932	580.692	215.542	338.124	178.543	114.392	148.312	2797.51				Nariño	312.759	202.68	356.995	265.198	376.952	228.094	428.854	399.438	163.121	76.3509	2810.44
Norte de Santander	358.341	128.041	158.141	367.472	427.186	387.859	549.734	464.712	391.03	158.718	3391.23				Norte de Santander	335.882	160.889	167.607	250.418	327.678	362.143	396.903	519.53	212.494	98.6463	2832.19
Putumayo	123.166	16.8584	76.0037	64.0204	75.1937	67.4336	111.109	16.8584	127.593	16.8584	695.094				Putumayo	34.4315	0	47.7381	34.4315	82.1696	103.294	17.2157	17.2157	47.7381	64.313	448.548
Quindío	78.0429	76.6872	80.6752	161.403	134.867	97.2892	112.797	118.009	204.082	43.6758	1107.53				Quindío	120.51	68.506	129.548	133.629	223.805	64.9538	76.3666	96.0076	90.8142	59.2504	1063.39
Risaralda	130.339	103.397	233.265	84.2921	262.908	131.454	129.353	127.975	236.566	43.6108	1483.16				Risaralda	193.456	0	123.717	181.555	186.183	150.845	154.102	146.058	120.51	65.6726	1322.1
San Andrés	0	29.614	0	0	0	0	0	0	0	0	29.614				San Andrés	0	0	0	0	0	9.03816	30.5223	0	0	0	39.5605
Santander	507.38	181.34	277.666	336.143	707.446	629.144	446.443	319.109	449.981	340.157	4194.81				Santander	393.992	309.604	340.201	271.355	607.852	314.769	360.421	369.71	353.101	261.885	3582.89
Sucre	171.236	160.383	165.171	319.143	299.416	386.117	203.142	437.491	521.948	180.796	2844.84				Sucre	122.305	117.089	296.81	397.952	287.323	197.013	110.037	342.072	365.49	272.763	2508.85
Tolima	320.029	68.3672	177.628	262.561	391.099	440.522	291.16	276.028	125.736	135.695	2488.83				Tolima	168.248	68.863	233.015	124.421	345.972	255.046	258.778	157.214	227.011	191.043	2029.61
Valle de Cauca	1022.25	660.898	1110.77	822.819	1484.97	1024.38	830.8	695.319	547.465	309.273	8508.93				Valle de Cauca	1020.88	625.644	901.113	770.52	1130.66	885.437	914.981	468.625	714.623	389.384	7821.87
Vaupes	0	30.3036	0	0	0	0	0	0	0	0	30.3036				Vaupes	0	0	47.7381	0	0	17.2157	34.4315	17.2157	47.5508	0	164.152
Vichada	0	0	16.8584	0	84.2921	16.8584	33.7168	16.8584	0	16.8584	185.443				Vichada	64.7665	0	0	17.2157	0	30.5223	0	0	17.2157	0	129.72
TOTAL
