# Supplementary material for: Burden of hydrocephalus disease in Colombia (2015-2024): An AVAD/DALYS analysis from official sources
Source: Research Square preprint supplement (doi:10.21203/rs.3.rs-7125623/v1), 2025-08-13
Supplement: Supplementary file 2 [file 06fbe095347e8efa0abeab72.xlsx]

## Sheet: Dalys Age
DALYS by age group	2015				2016				2017				2018				2019				2020				2021				2022				2023				2024
	Males	Female	T	DAlY*1000	Males	Female	T	*1000	Males	Female	T	*1000	Males	Female	T	*1000	Males	Female	T	*1000	Males	Female	T	*1000	Males	Female	T	*1000	Males	Female	T	*1000	Males	Female	T	*1000	Males	Female	T	*1000
0-4	1693.34	1614.69	3308.02	0.852215	2117.18	1401.22	3518.4	0.906412	1571.92	1097.31	2669.22	0.687647	1204.41	1334.93	2539.34	0.654185	1414.9	1122.4	2537.3	0.653661	1083.8	910.239	1994.04	0.513706	993.3	940.387	1933.69	0.498157	1234.3	819.047	2053.35	0.528985	1084.01	849.382	1933.39	0.498081	571.9	455.026	1026.93	0.264557
5-14	205.929	354.539	560.468	0.0713389	323.016	416.61	739.626	0.094143	264.472	297.084	561.556	0.0714775	292.717	324.08	616.797	0.0785088	526.206	386.152	912.358	0.116129	556.504	147.676	704.181	0.0896314	322.331	295.93	618.261	0.0786951	262.418	353.385	615.803	0.0783822	407.75	382.112	789.861	0.100537	175.63	267.203	442.833	0.0563658
15-29	306.163	881.137	1187.3	0.0946329	166.815	644.149	810.965	0.0646374	220.084	803.165	1023.25	0.0815573	358.303	664.318	1022.62	0.0815073	249.218	955.893	1205.11	0.0960526	329.954	741.674	1071.63	0.0854134	277.225	839.508	1116.73	0.0890084	417.504	1043	1460.51	0.116409	387.095	975.187	1362.28	0.10858	413.435	806.42	1219.85	0.0972277
30-44	96.2638	359.307	455.571	0.0438579	72.5416	322.858	395.399	0.0380652	118.967	381.452	500.419	0.0481755	168.805	411.315	580.121	0.0558484	195.482	707.531	903.013	0.0869334	95.0159	501.972	596.987	0.0574722	96.2638	731.392	827.655	0.0796787	222.158	660.24	882.398	0.0849487	331.932	681.35	1013.28	0.097549	214.212	396.602	610.814	0.0588033
45-59	93.2841	489.033	582.318	0.0708908	99.3182	399.359	498.677	0.0607085	116.63	383.073	499.704	0.0608335	139.51	427.325	566.835	0.069006	271.13	578.727	849.857	0.103461	93.2841	816.974	910.258	0.110814	295.775	773.726	1069.5	0.1302	248.017	580.14	828.157	0.100819	177.613	549.111	726.723	0.0884706	152.644	324.328	476.972	0.0580661
60-69	432990	328534	761524	209.596	187976	280247	468223	128.87	220621	338180	558802	153.8	392130	347846	739976	203.665	522887	502442	1.02533e+06	282.203	375876	454204	830080	228.465	375881	657133	1.03301e+06	284.319	351400	434908	786309	216.417	277846	357694	635539	174.921	204328	270755	475083	130.758
70-79	72348.2	94024.2	166372	87.3703	54303.6	47023.6	101327	53.2119	63315.9	85716.2	149032	78.2641	92757.7	121644	214402	112.593	160588	113414	274002	143.892	99563.7	88540.4	188104	98.7827	135700	154762	290462	152.536	124429	116133	240562	126.331	72405.9	124404	196810	103.354	56557.5	66388	122945	64.5647
+80	17857.9	14402.3	32260.2	33.1897	13765.7	11746.1	25511.8	26.2469	17173	15504.5	32677.5	33.6191	20598.6	35106.4	55705	57.3101	32269.2	29694.6	61963.8	63.7493	18577.7	23447.7	42025.4	43.2363	13777.9	18952.8	32730.7	33.6738	24765.1	20705.6	45470.7	46.7809	22679.1	19810	42489.1	43.7134	12383	13515.9	25898.8	26.6451
		2015	2016	2017	2018	2019	2020	2021	2022	2023	2024	Total
Age group	0-4	0.852215	0.906412	0.687647	0.654185	0.653661	0.513706	0.498157	0.528985	0.498081	0.264557	6.05761
	5-14	0.0713389	0.094143	0.0714775	0.0785088	0.116129	0.0896314	0.0786951	0.0783822	0.100537	0.0563658	0.835209
	15-29	0.0946329	0.0646374	0.0815573	0.0815073	0.0960526	0.0854134	0.0890084	0.116409	0.10858	0.0972277	0.915025
	30-44	0.0438579	0.0380652	0.0481755	0.0558484	0.0869334	0.0574722	0.0796787	0.0849487	0.097549	0.0588033	0.651332
	45-59	0.0708908	0.0607085	0.0608335	0.069006	0.103461	0.110814	0.1302	0.100819	0.0884706	0.0580661	0.85327
	60-69	209.596	128.87	153.8	203.665	282.203	228.465	284.319	216.417	174.921	130.758	2013.01
	70-79	87.3703	53.2119	78.2641	112.593	143.892	98.7827	152.536	126.331	103.354	64.5647	1020.9
	+80	33.1897	26.2469	33.6191	57.3101	63.7493	43.2363	33.6738	46.7809	43.7134	26.6451	408.164
